# Supplementary material for: Current knowledge of the Southern Hemisphere marine microbiome in eukaryotic hosts and the Strait of Magellan surface microbiome project
Source: PeerJ journal article supplement (doi:10.7717/peerj.15978), 2023-10-03

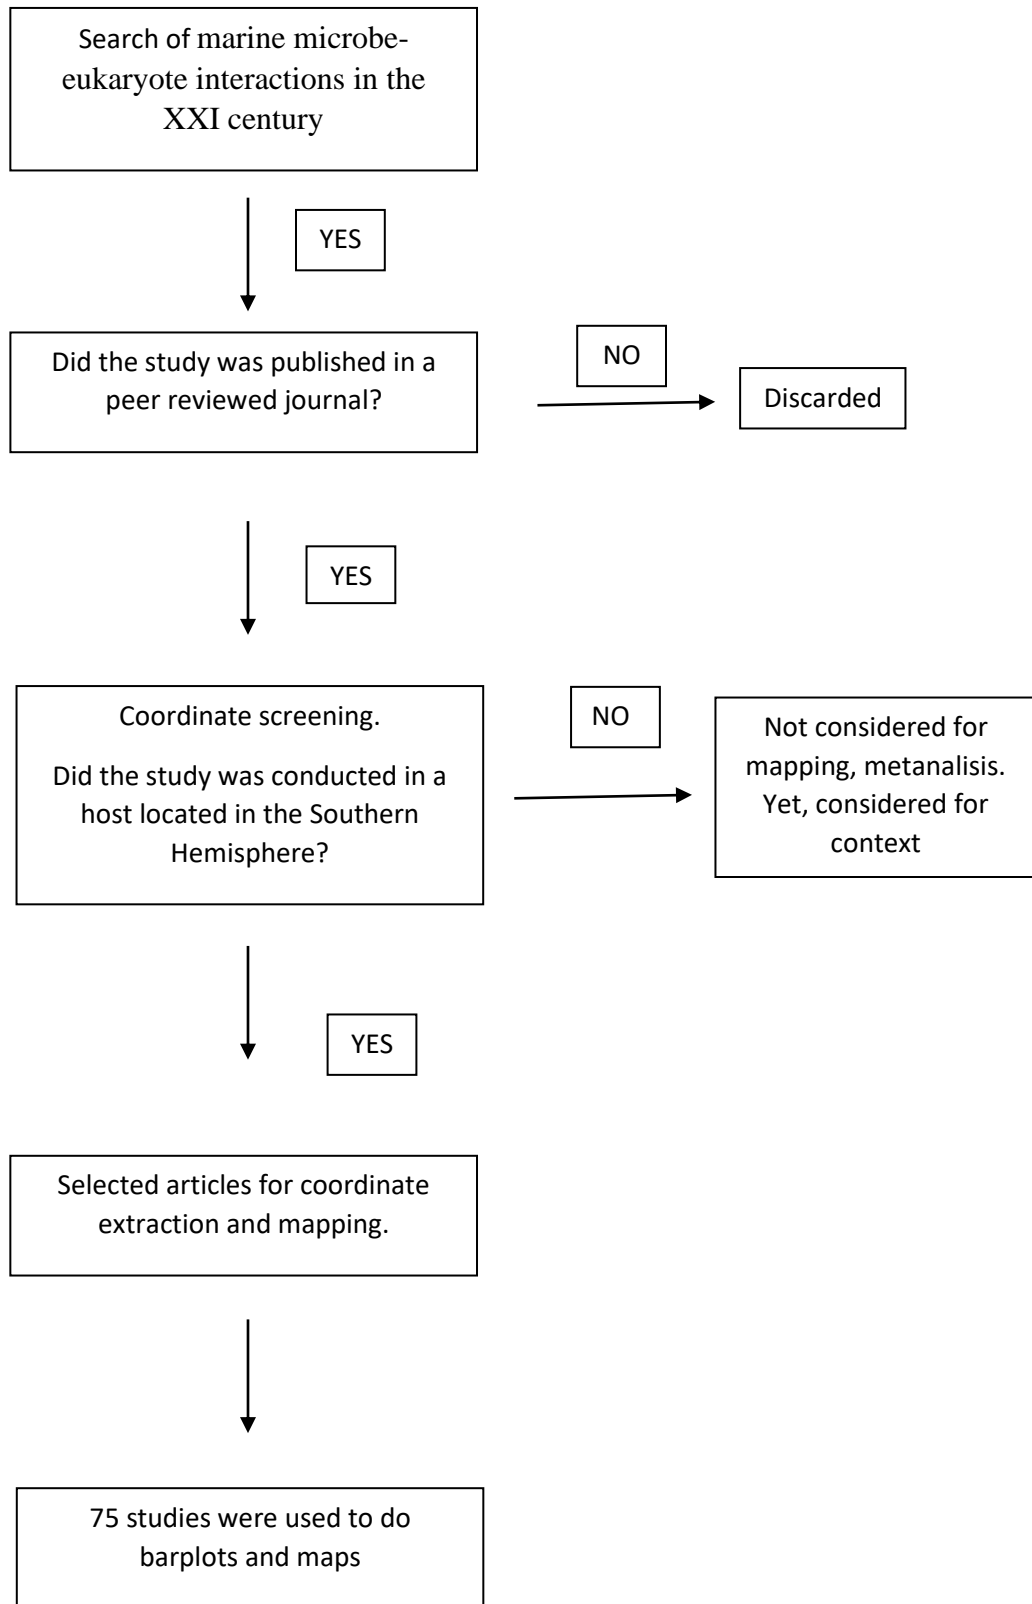

Supplement: Prisma_diagram.pdf [file Prisma_diagram.pdf]
