# Supplementary material for: Current knowledge of the Southern Hemisphere marine microbiome in eukaryotic hosts and the Strait of Magellan surface microbiome project
Source: PeerJ. 2023 Oct 3;11:e15978. doi: 10.7717/peerj.15978 (PMC10557944; doi:10.7717/peerj.15978)
Supplement: Supplemental Information 3 — Host, coordinates, molecular method, and latitude. [file peerj-11-15978-s003.xlsx]

## Sheet: Host
Host	Lat	Lon	Molecular approach	Country	Lat stauts
Macroalgae	-22.7413	-41.8821	Holobiont	Brazil	Template
Macroalgae	-22.7619	-41.8749	Holobiont	Brazil	Template
Macroalgae	-22.9625	-41.0247	Holobiont	Brazil	Template
Macroalgae	-34.3014	18.8164	16S	South Africa	Template
Macroalgae	-62.09	-58.28	ITS	South Shetland islands, Antartic Peninsula	Antarctic
Macroalgae	-61.1126	-55.1402	ITS	Elephant island, Antartica	Antarctic
Macroalgae	-62.3833	-58.45	ITS	King George Island, Antartica	Antarctic
Macroalgae	-62.8833	-60.6667	ITS	Deception Island, Antartica	Antarctic
Macroalgae	-62.1089	-57.9333	ITS	King George Island, Antartica	Antarctic
Macroalgae	-62.6422	-59.5	ITS	Robert Island, Antartica	Antarctic
Macroalgae	-62.6756	-60.6	ITS	Livingston Island, Antartica	Antarctic
Macroalgae	-62.7667	-62.7667	ITS	Deception Island, Antartica	Antarctic
Macroalgae	-42.786	-64.9584	16S	Argentina	Cold
Macroalgae	-30.1314	114	16S	Australia	Template
Macroalgae	-43	152	16S	Australia	Cold
Macroalgae	-32	152	Holobiont	Australia	Template
Macroalgae	-42	152	Holobiont	Australia	Cold
Macroalgae	-33.1389	-71.7058	16S	Chile	Template
Macroalgae	-33.3692	-71.6681	16S	Chile	Template
Macroalgae	-42.5336	-73.398	16S	Chile	Cold
Macroalgae	-34.0727	151.152	Shotgun Metagenomics	Australia	Template
Macroalgae	-33.826	151.263	Shotgun Metagenomics	Australia	Template
Macroalgae	-33.9922	151.231	Shotgun Metagenomics	Australia	Template
Macroalgae	-33.8466	151.195	Shotgun Metagenomics	Australia	Template
Macroalgae	-33.8513	151.206	16S	Australia	Template
Macroalgae	-30.2677	153.143	16S	Australia	Template
Sponges	-62.1998	-58.9431	16S & 18S	South Shetland islands, Antartic Peninsula	Antarctic
Sponges	-62.1882	-58.873	16S & 18S	South Shetland islands, Antartic Peninsula	Antarctic
Sponges	-33.5057	25.4898	16S	South Africa	Template
Sponges	-53.0606	-70.8561	16S	Chile	Cold
Sponges	-62.2047	-58.9464	16S	King George Island, Antartica	Antarctic
Sponges	-64.8756	-63.5839	16S	Doumer Island, Antartica	Antarctic
Sponges	-74.7821	164.006	16S	Adelie Cove, Antartica	Antarctic
Sponges	-74.7531	164.092	16S	Caletta, Antartica	Antarctic
Sponges	-74.7144	164.135	16S	Faraglioni, Antartica	Antarctic
Sponges	-74.6333	164.153	16S	Gondwana, Antartica	Antarctic
Sponges	-74.7	164.133	16S	Road Bay, Antartica	Antarctic
Sponges	-74.6833	164.067	16S	Thetys Bay, Antartica	Antarctic
Sponges	-74.6667	164.05	16S	Terra Nova, Antartica	Antarctic
Sponges	-74.7167	164.2	16S	Terra Nova, Antartica	Antarctic
Sponges	-64.8756	-63.5839	16S	Western Antarctic Peninsula	Antarctic
Sponges	-74.7	164.033	16S	Tethys Bay, Antartica	Antarctic
Sponges	-74.6667	164.067	16S	Tethys Bay, Antartica	Antarctic
Sponges	-74.6667	164.067	16S	Tethys Bay, Antartica	Antarctic
Sponges	-74.6667	164.067	16S	Tethys Bay, Antartica	Antarctic
Sponges	-35.5213	138.185	Shotgun Metagenomics	Rapid Bay, Australia	Template
Sponges	-64.8663	-63.6296	16S	Western Antarctic Peninsula	Antarctic
Sponges	-62.98	-60.56	16S	South Shetland islands, Antartic Peninsula	Antarctic
Sponges	-63.32	-57.9	16S	South Shetland islands, Antartic Peninsula	Antarctic
Sponges	-67.56	-68.11	16S	South Shetland islands, Antartic Peninsula	Antarctic
Sponges	-62.2031	-58.9208	Other	King George Island, Antartica	Antarctic
Sponges	-62.1998	-58.9431	Shotgun Metagenomics	King George Island, Antartica	Antarctic
Sponges	-62.1882	-58.873	Shotgun Metagenomics	King George Island, Antartica	Antarctic
Sponges	-61.15	-55.9833	16S	South Shetland islands, Antartic Peninsula	Antarctic
Sponges	-62.3	-61.21	16S	South Shetland islands, Antartic Peninsula	Antarctic
Sponges	-26	166	16S	New Zealand	Template
Sponges	-48	172	16S	New Zealand	Cold
Sponges	-9.81667	150.817	16S	New Guinea	Tropical
Sponges	-64.85	-63.5833	16S	Western Antarctic Peninsula	Antarctic
Invertebrates	-77.85	166.65	16S	McMurdo Sound, Antarctica	Antarctic
Invertebrates	-77.85	166.75	16S	McMurdo Sound, Antarctica	Antarctic
Invertebrates	-77.85	166.667	16S	McMurdo Sound, Antarctica	Antarctic
Invertebrates	-64.7667	-64.05	16S	Antarctic Peninsula	Antarctic
Invertebrates	-77.5267	171.335	16S	Ross Sea, Antarctica	Antarctic
Invertebrates	-32.75	152.167	16S	New South Wales, Australia	Template
Invertebrates	-60	70	16S	Indian Sector, Southern Ocean	Antarctic
Invertebrates	-65	80	16S	Indian Sector, Southern Ocean	Antarctic
Invertebrates	-65	90	16S	Indian Sector, Southern Ocean	Antarctic
Invertebrates	-60	91	16S	Indian Sector, Southern Ocean	Antarctic
Invertebrates	-60	120	16S	Indian Sector, Southern Ocean	Antarctic
Invertebrates	-60	130	16S	Indian Sector, Southern Ocean	Antarctic
Invertebrates	-60	140	16S	Indian Sector, Southern Ocean	Antarctic
Invertebrates	-42.8805	147.325	16S	University of Tasmania, Australia	Cold
Invertebrates	-62.2362	-58.7774	Shotgun Metagenomics	King George Island, Antartica	Antarctic
Invertebrates	-37.7839	49.6502	Holobiont	Southwest Indian Ridge	Template
Invertebrates	-30	-180	Holobiont	South Pacific	Template
Invertebrates	-8.14	8.63	Holobiont	East Africa	Tropical
Invertebrates	-26.67	12.46	Holobiont	Southeast Africa	Template
Invertebrates	-26.4	45.07	Holobiont	Madagascar	Template
Invertebrates	-24.72	47.57	Holobiont	Madagascar	Template
Invertebrates	-14.23	46.74	Holobiont	Madagascar	Tropical
Invertebrates	-11.73	48.3	Holobiont	Madagascar	Tropical
Invertebrates	-29.62	113.62	Holobiont	Australia	Template
Invertebrates	-35.89	151.25	Holobiont	Australia	Template
Invertebrates	-26.53	154.36	Holobiont	Australia	Template
Invertebrates	-8	128.64	Holobiont	Indonesia	Tropical
Invertebrates	-2.12	139.49	Holobiont	Indonesia	Tropical
Invertebrates	-2.86	141.97	Holobiont	Indonesia	Tropical
Invertebrates	-12.01	151.78	Holobiont	Indonesia	Tropical
Invertebrates	-6.53	151.69	Holobiont	Indonesia	Tropical
Invertebrates	-2.07	155.49	Holobiont	Indonesia	Tropical
Invertebrates	-21.57	166.63	Holobiont	Indonesia	Template
Fish	-34.7301	135.85	16S	Port Lincoln, Australia	Template
Fish	-30.0002	136.209	16S	Southern Australia	Template
Fish	-67.4833	72.9167	16S	Antarctica	Antarctic
Fish	-64.5	-62.33	16S	Antarctic Peninsula	Antarctic
Seabirds	-63	-60.6667	16S	Deception Island, Antarctica	Antarctic
Seabirds	-38.4833	145.233	16S	Phillip Island Nature Park, Australia	Template
Seabirds	-54	-38.05	16S	Bird Island, South Georgia	Cold
Seabirds	-46.4167	51.8667	16S	Baie du Marine, Possession Island	Cold
Seabirds	-38.4833	145.233	16S	Phillip Island, Australia	Template
Seabirds	-62.2278	-58.7569	16S	King George Island, Antartica	Antarctic
Seabirds	-60.7167	-45.5833	16S	Signy Islan, South Orkney Islands	Antarctic
Seabirds	-71.3106	170.208	16S	Capes Adare, Antarctica	Antarctic
Seabirds	-77.214	166.44	16S	Marie Byrd, Antarctica	Antarctic
Seabirds	-77.4622	169.282	16S	Crozier, Antarctica	Antarctic
Seabirds	-72.3185	170.222	16S	Cape Hallett, Antarctica	Antarctic
Seabirds	-77.5539	166.162	16S	Cape Royds, Antarctica	Antarctic
Seabirds	-72.6218	170.202	16S	Ross Sea, Antarctica	Antarctic
Seabirds	-72.4041	170.311	16S	Ross Sea, Antarctica	Antarctic
Seabirds	-54	-38.05	16S	South Georgia	Cold
Seabirds	-38.4833	145.233	16S	Phillip Island, Australia	Template
Seabirds	-42.0833	-63.85	Other	Peninsula Valdés, Argentina	Cold
Seabirds	-63.3181	-57.8986	RNA viromics	Kopaitik island, Antarctic Peninsula	Antarctic
Seabirds	-64.8239	-62.8569	RNA viromics	Paradise Bay, Antarctic Peninsula	Antarctic
Seabirds	-62.2333	-58.7667	RNA viromics	King George Island, Antartica	Antarctic
Seabirds	-62.1597	-58.4714	RNA viromics	King George Island, Antartica	Antarctic
Seabirds	-37.9866	144.661	Metatranscriptomics	Melbourne, Australia	Template
Seabirds	-38.231	145.479	Metatranscriptomics	Melbourne, Australia	Template
Seabirds	-39.9311	143.851	Metatranscriptomics	Bass Strait Innamincka Regional Reserve, Australia	Template
Seabirds	-27.5411	140.596	Metatranscriptomics	Bass Strait Innamincka Regional Reserve, Australia	Template
Seabirds	-63.3167	-57.85	Metatranscriptomics	Bernardo O'Higgins Base, Antarctica	Antarctic
Seabirds	-64.8167	-62.85	Metatranscriptomics	Paradise Bay, Antarctic Peninsula	Antarctic
Seabirds	-27.593	-48.558	Other	Santa Catarina State, Brazil	Template
Seabirds	-49.85	70.8333	16S	Kerguelen archipielago	Cold
Marine mammals	-14.3064	-170.695	16S	American Samoa, South Pacific	Tropical
Marine mammals	-68.5	-68.5	16S	Marguerite Bay, Antarctica	Antarctic
Marine mammals	-64.833	-62.65	16S	Andvord Bay, Antarctica	Antarctic
Marine mammals	-63	-59	16S	Bransfield Strait, Antarctica	Antarctic
Marine mammals	-64.583	-61.633	16S	Charlotte Bay, Antarctica	Antarctic
Marine mammals	-65.0167	-63.3167	16S	Flandres Bay, Antarctica	Antarctic
Marine mammals	-64.5	-62.333	16S	Gerlache Strait, Antarctica	Antarctic
Marine mammals	-64.77	-64.05	16S	Palmer Station, Antarctica	Antarctic
Marine mammals	-65.0167	-64.1167	16S	Penola Strait, Antarctica	Antarctic
Marine mammals	-64.6775	-62.0567	16S	Wilhemina Bay, Antarctica	Antarctic
Marine mammals	-69.5	-60	Shotgun Metagenomics	Antarctic Peninsula	Antarctic
Marine mammals	-65	-175	Shotgun Metagenomics	Ross Sea, Antarctica	Antarctic
Marine mammals	-25.2882	152.768	16S	Queensland, Australia	Template
Marine mammals	-25.2882	152.768	16S	Queensland, Australia	Template
Marine mammals	-43	-73	16S	Corcovado Gulf, Chile	Cold
Marine mammals	-29.2519	-71.5389	16S	Pingüino Humboldt Natural Re,serve, Chile	Template
Marine mammals	-53.8333	-71.8	16S	Magellan Strait, Chile	Cold
Marine mammals	-35.9833	137.317	Shotgun Metagenomics	Kangaroo Island, Australia	Template
Marine mammals	-39.2631	146.519	16S	Kanowna Island, Australia	Template
Marine mammals	-62.2333	-58.65	16S	South Shetland islands, Antartic Peninsula	Antarctic
Marine mammals	-64.15	-60.95	16S	Western Antarctic Peninsula	Antarctic
Marine mammals	-21.1833	115.633	16S	Beagle Island, Australia	Template
Marine mammals	-33.6	134.817	16S	West Waldegrave Island, Australia	Template
Marine mammals	-34.9889	135.621	16S	Liguanea Island, Australia	Template
Marine mammals	-35.8044	137.227	16S	Kangaroo Island, Australia	Template
Marine mammals	-54	-38.0333	16S	South Georgia	Cold
Marine mammals	-62.2228	-58.7883	16S	King George Island, Antartica	Antarctic
Marine mammals	-33.6414	-78.8411	16S	Juan Fernandez Archipielago, Chile	Template
Marine mammals	-29.3589	-49.7362	16S	Rio Grande do Sul, Brazil	Template
Marine mammals	-30.3996	-50.2902	16S	Palmares do Sul, Brazil	Template
